# Supplementary material for: Assessment of myocardial fibrosis in patients with systemic sclerosis using [68Ga]Ga-FAPI-04-PET-CT
Source: PubMed Central journal article supplement (PMC10119041; doi:10.1007/s00259-022-06081-4), 2022-12-16
Supplement: 259_2022_6081_MOESM2_ESM.pdf [file 259_2022_6081_MOESM2_ESM.pdf]

**A**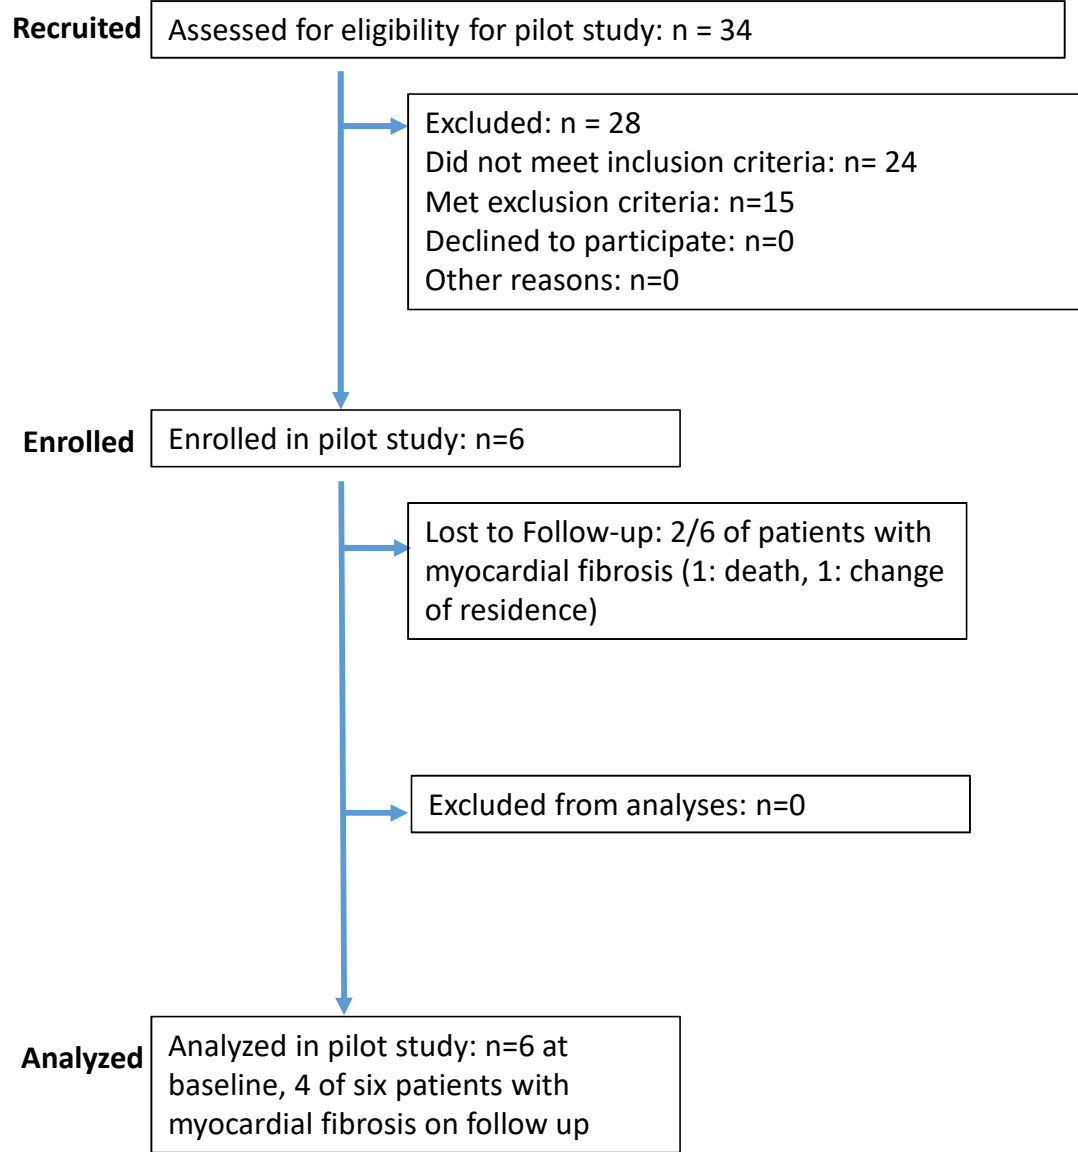**B**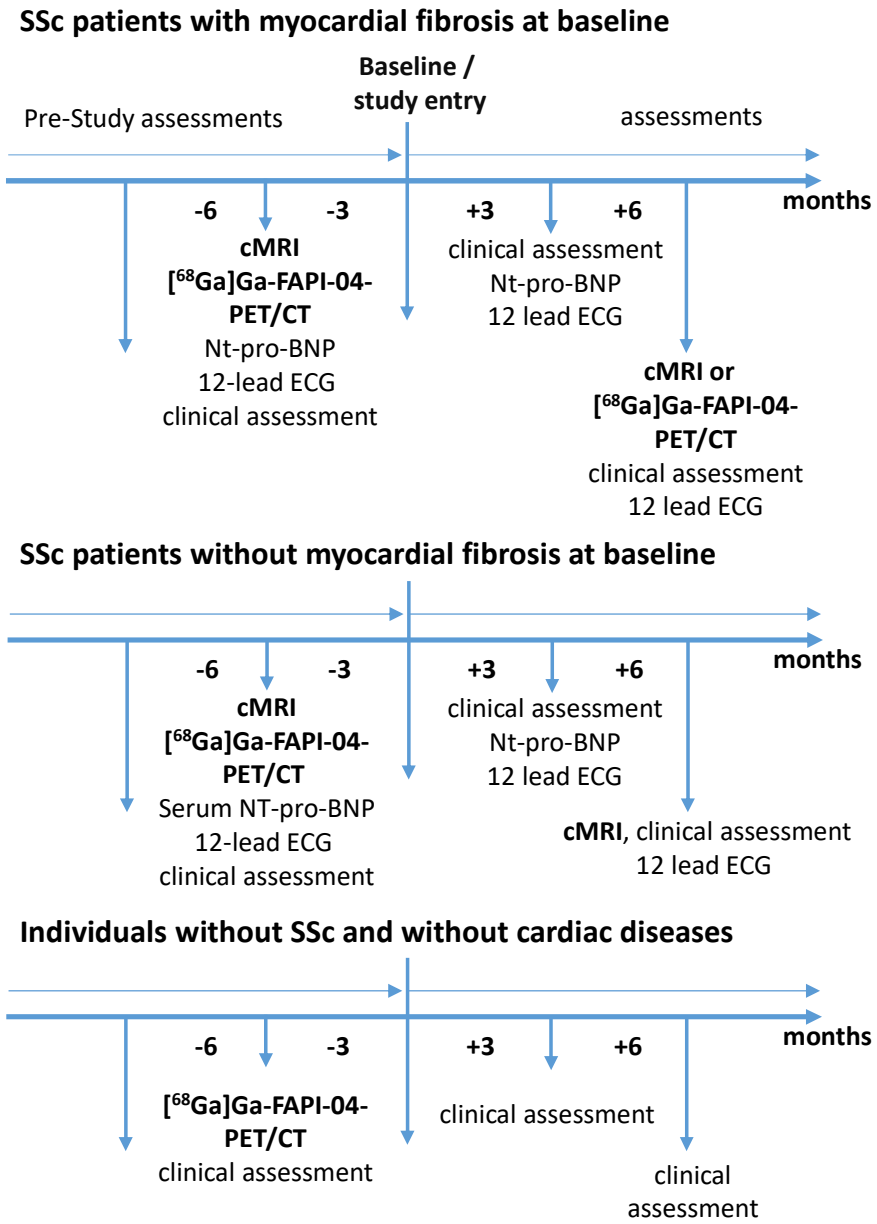

**Supplementary Figure 1: A Participant flow diagram. B Pictogramm of assessments included in the trial.** cMRI: cardiac MRI, ECG: electrocardiogramm, Nt-pro-BNP: N-terminal-pro- brain natriuretic peptide. [<sup>68</sup>Ga]Ga-FAPI-04: <sup>68</sup>Gallium-labeled Fibroblast Activation-Protein-Inhibitor-04, PET: positron-emission tomography, CT: computational tomography

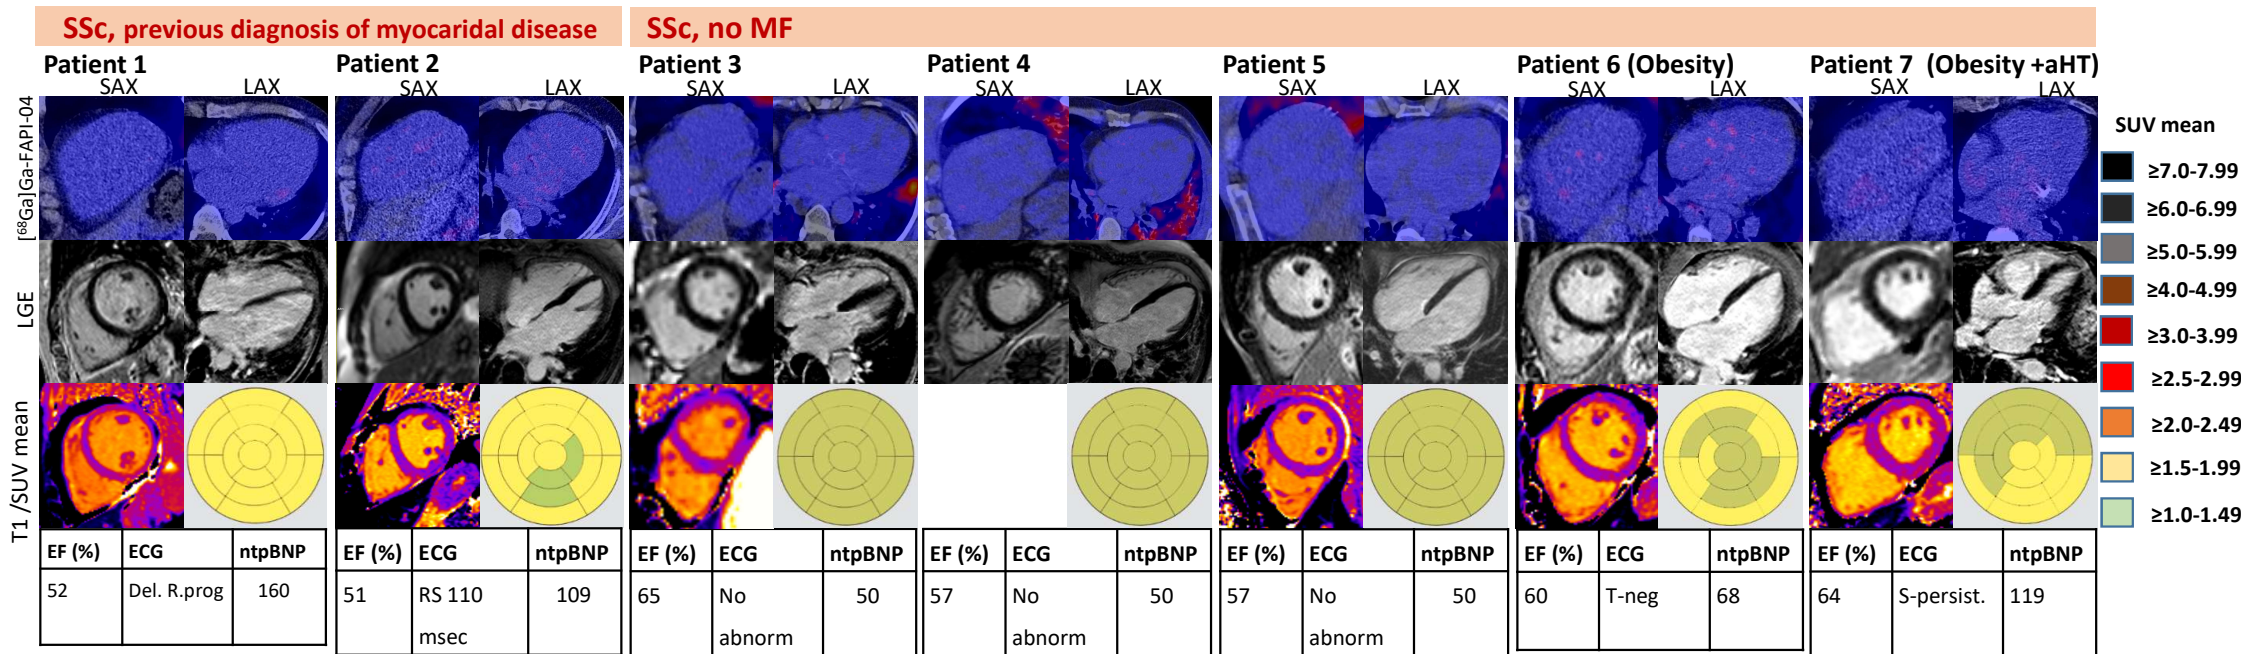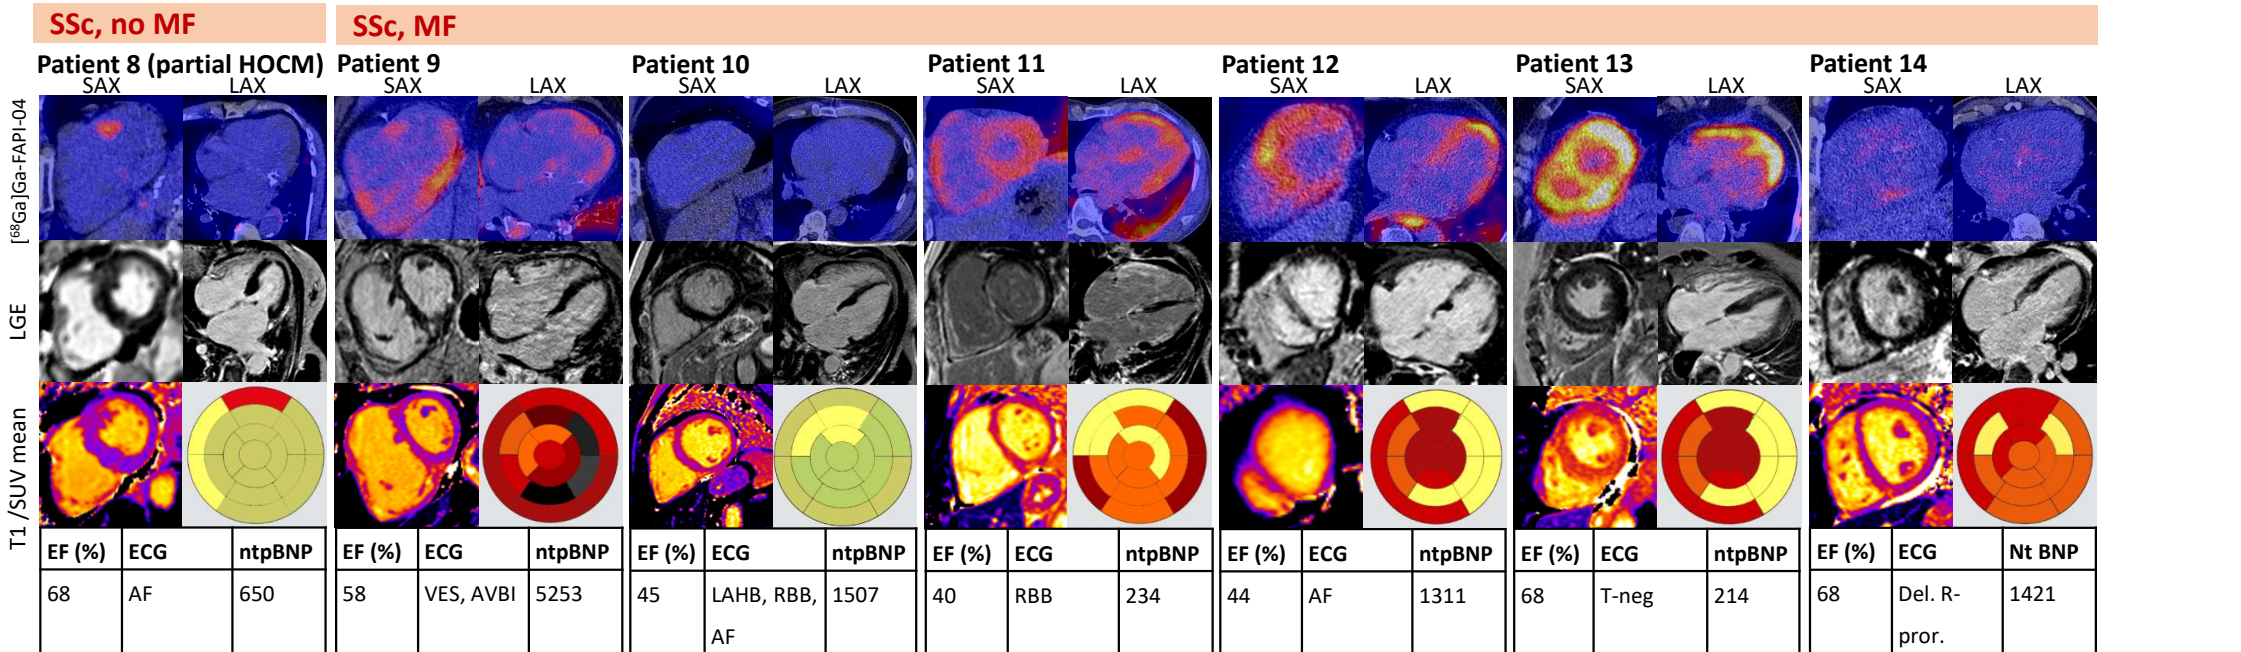

**Supplementary Figure 2: Baseline investigations of all SSc-participants:  $^{68}\text{Ga}$ -FAPI-04-PET/CT scan, late gadolinium enhancement (LGE), T1-mapping, SUV mean according to the 17-regions AHA-modell, clinical information: ejection fraction (MRI; EF, %), electrocardiogramm (ECG), nt-pro-BNP (ntpBNP, pg/ml). AHA: American heart Association, SAX: short axis-, LAX: long axis view.**

### Serum NT-pro-BNP

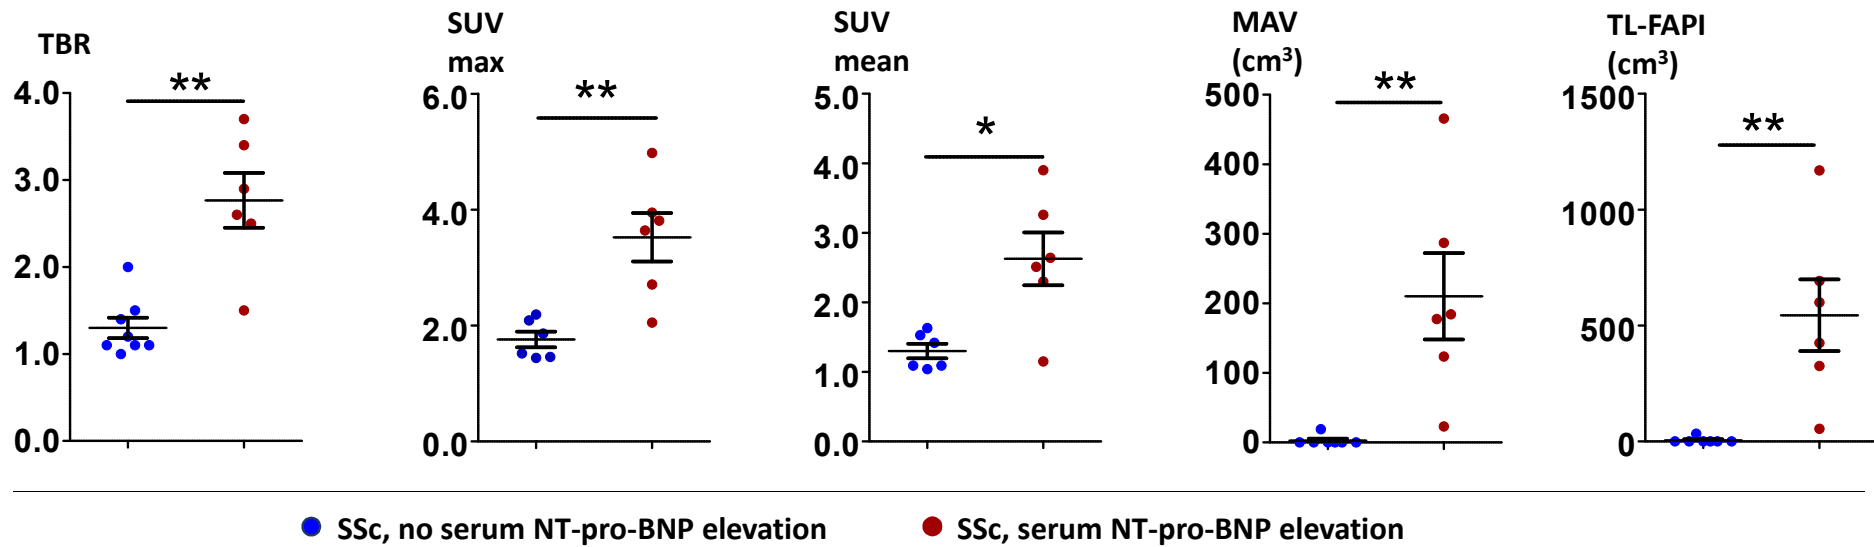

**Supplementary Figure 3: [68Ga]Ga-FAPI-uptake values depending on the presence of elevation of serum NT pro BNP.** Results are presented as median with interquartile range. \*p<0.05; \*\*p<0.01; \*\*\*p<0.001.

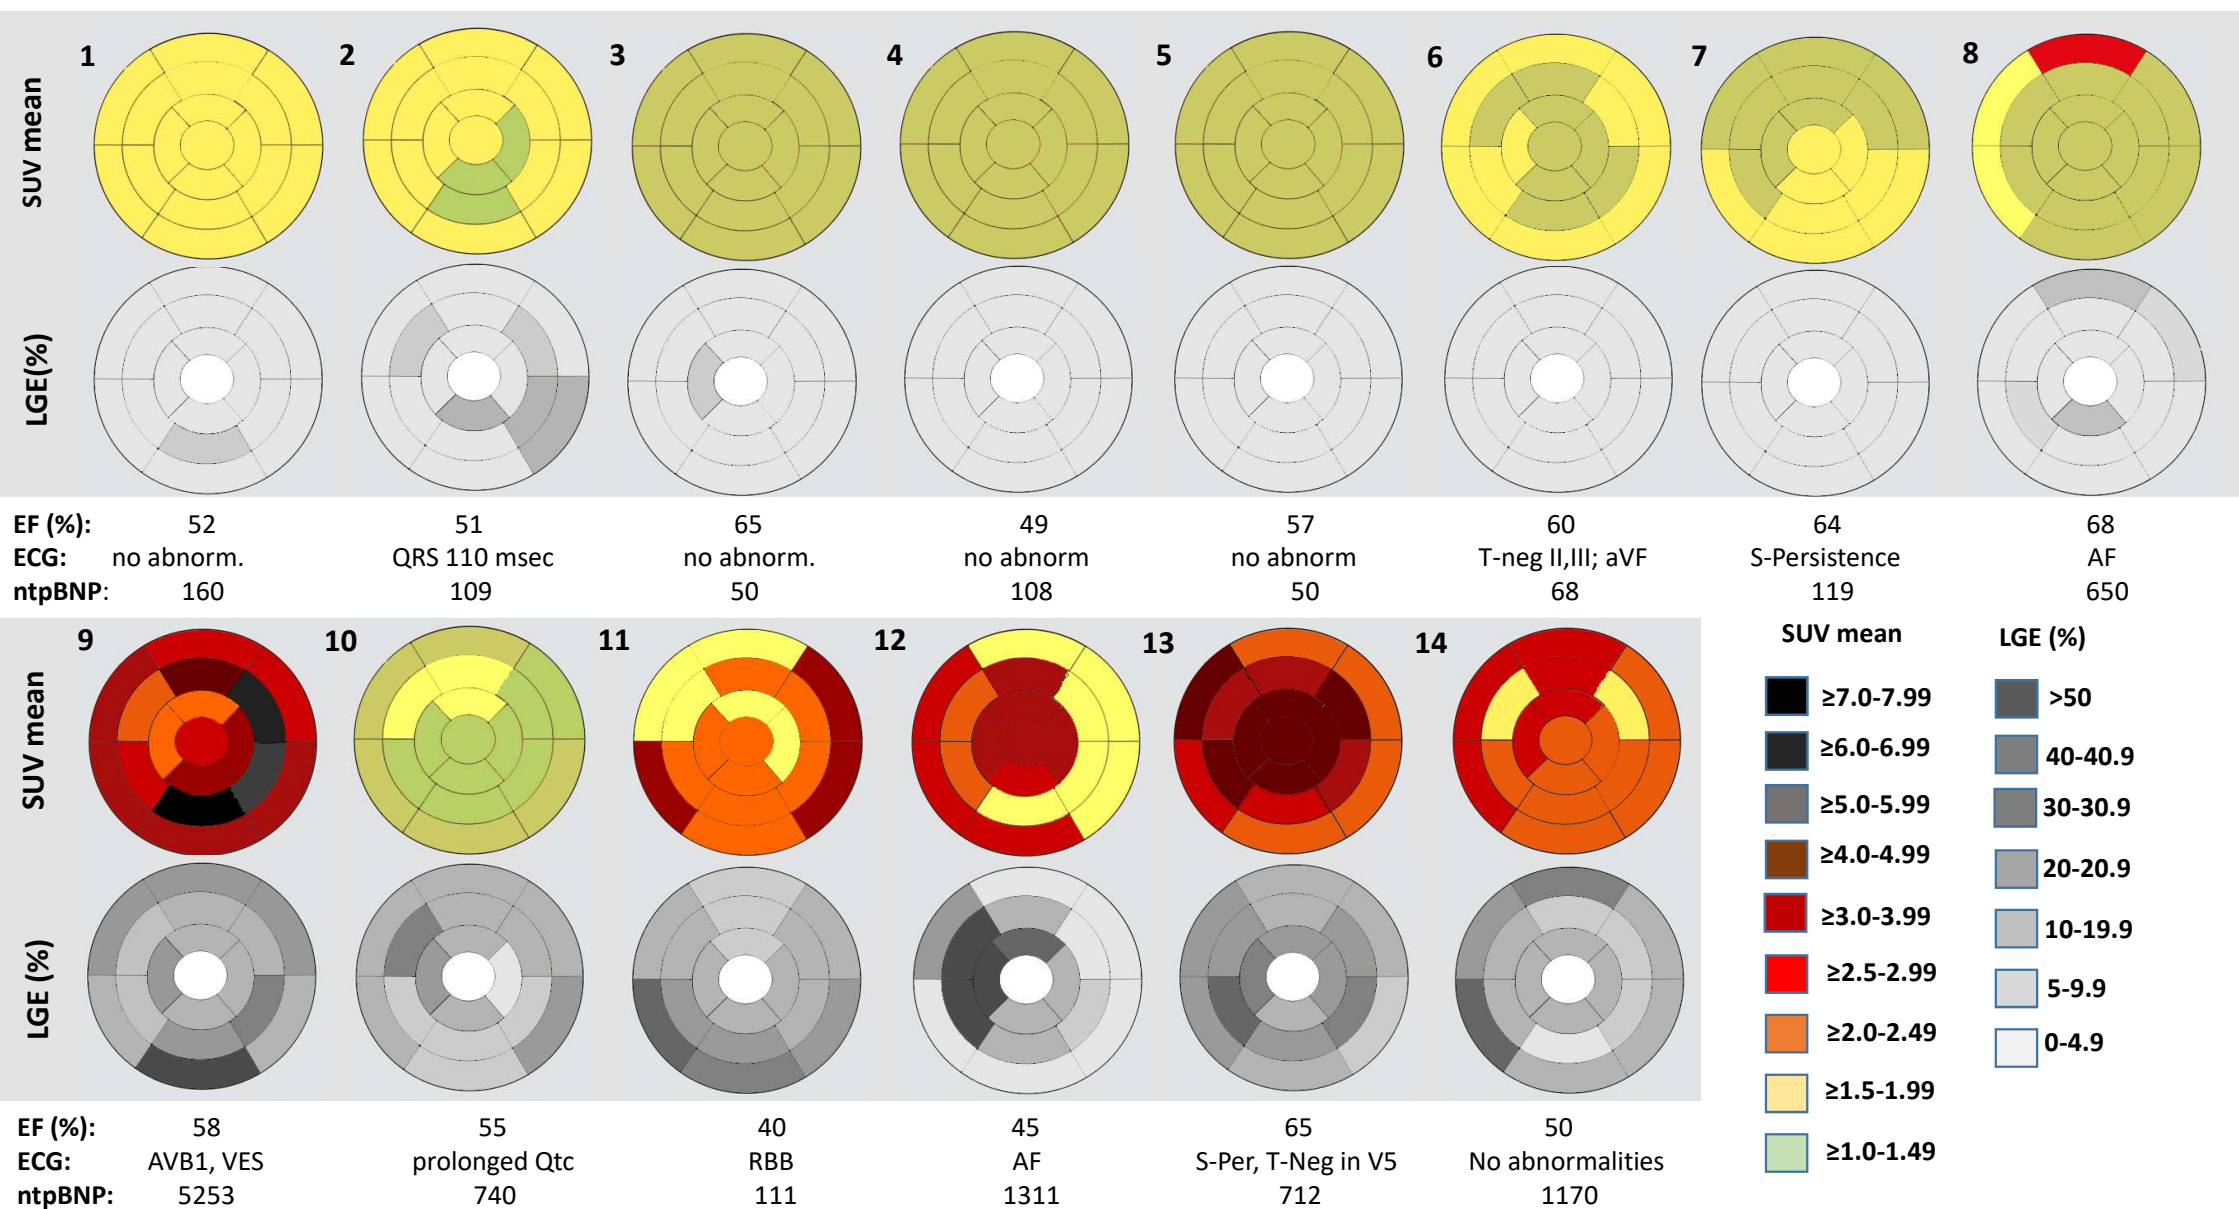

**Supplementary Figure 4: Mapping of SUV mean values and LGE (%) to the 17 regions of the AHA-model in all SSC-participants (1-14) at baseline: The intensity of cMRI-based findings and <sup>68</sup>Ga-FAPI-04-uptake differ inter-individually arguing for different activity of the fibrotic remodeling process.** EF: ejection fraction (%), ECG: electrocardiogram, Nt-pro-BNP (N-terminal-pro-BNP, pg/ml), AVB: atrioventricular block. VES: ventricular extrasystoles. LAHB: left anterior hemi block, RBB: right bundle block, AF: atrial fibrillation, S-Per: S-persistence, T-neg: negative T, R-progr: R-progression.

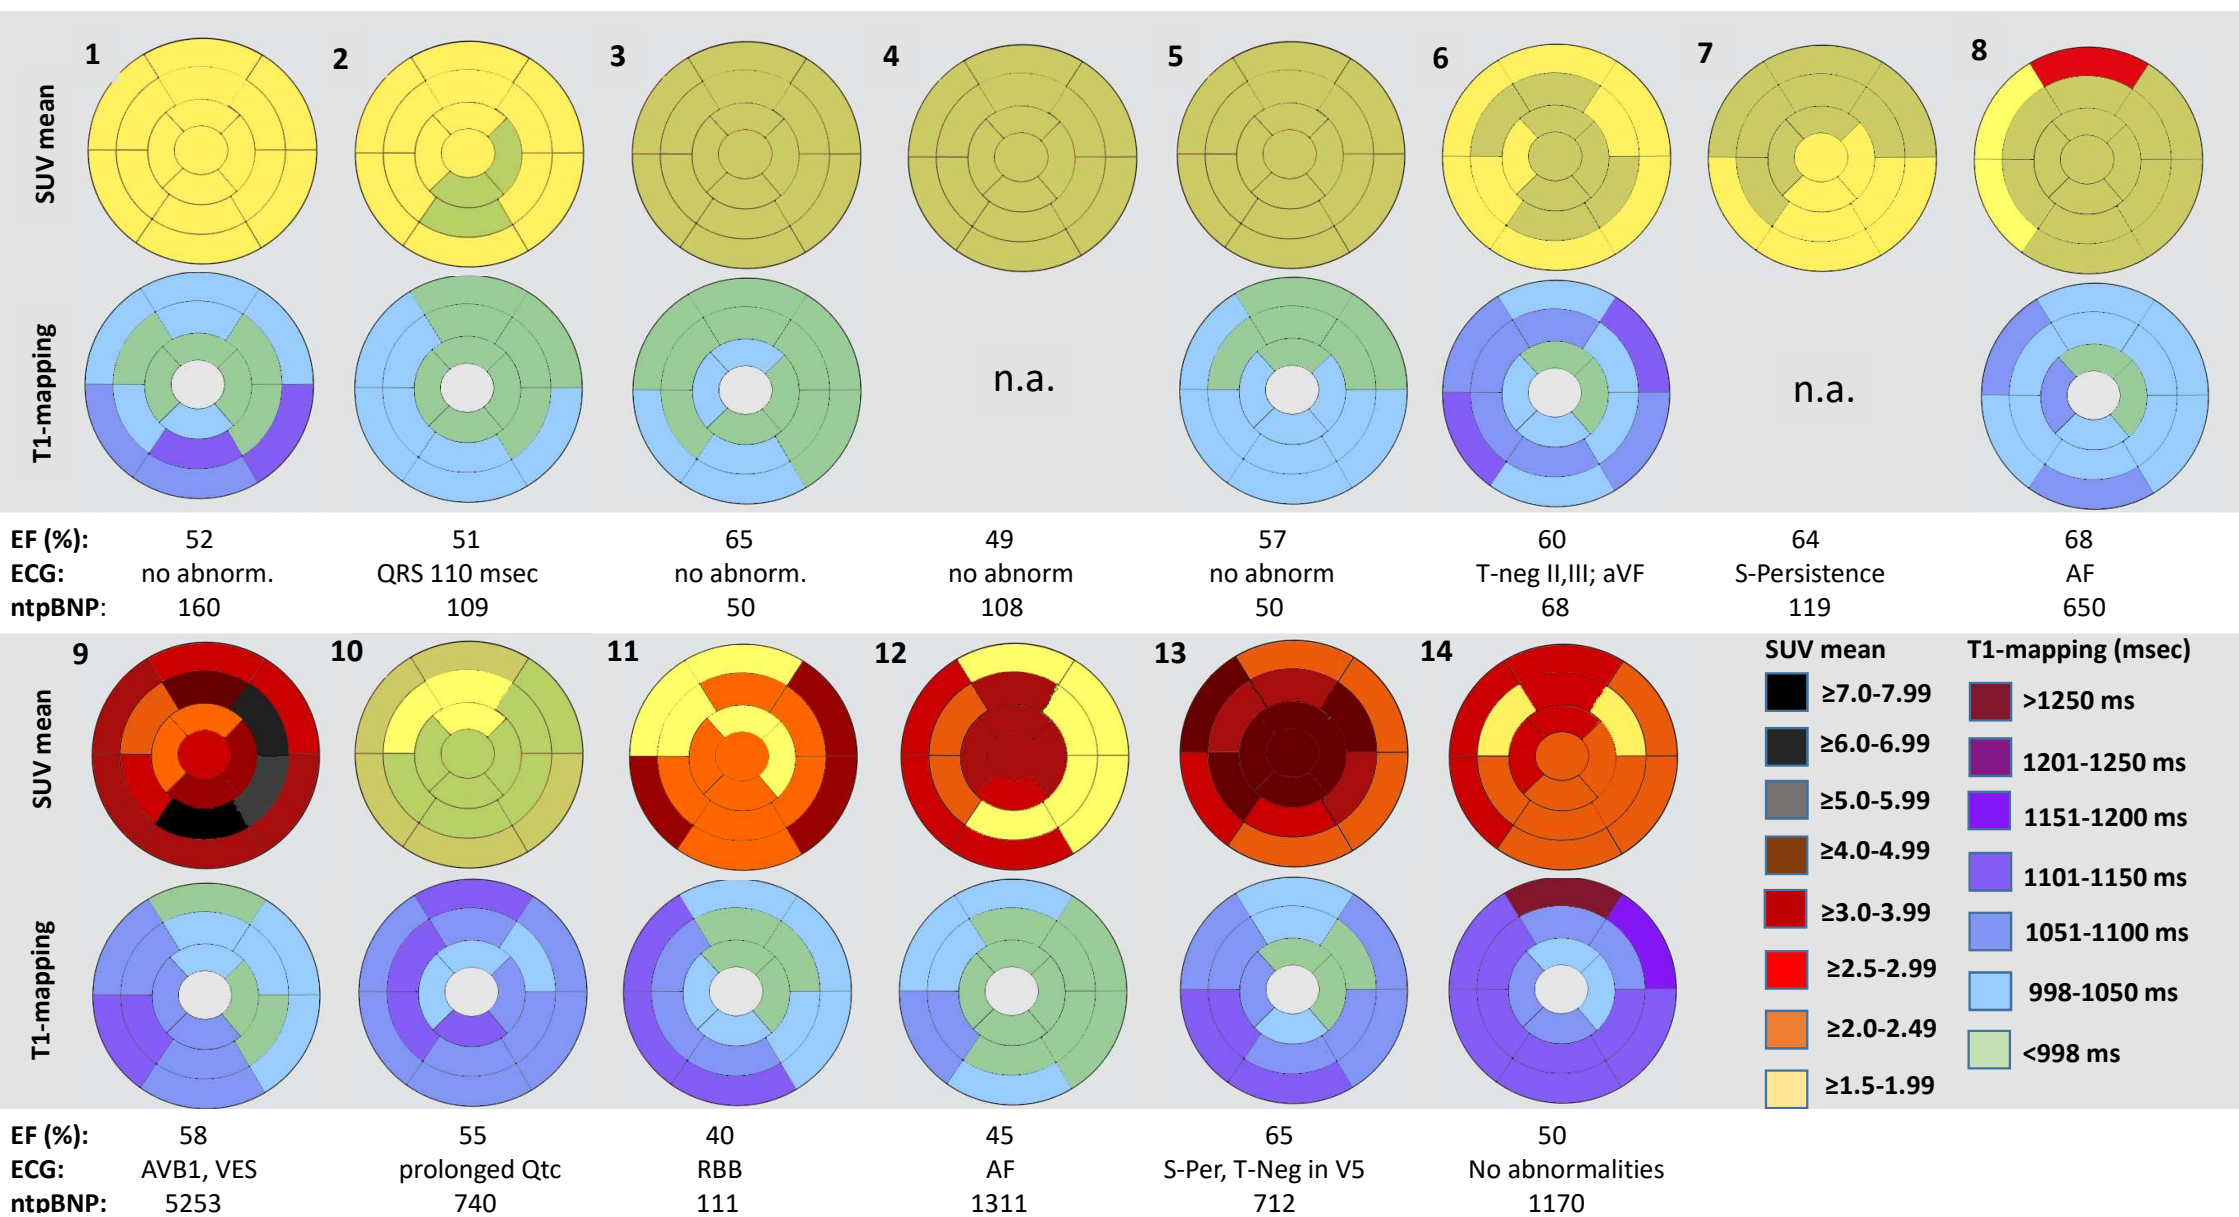

**Supplementary Figure 5: Mapping of SUV mean values and T1-relaxation times to the 17 regions of the AHA-model in all SSc-participants (1-14) at baseline: The intensity of cMRI-based findings and  $^{68}\text{Ga}$ -FAPI-04-uptake differ inter-individually arguing for different activity of the fibrotic remodeling process.** EF: ejection fraction (%), ECG: electrocardiogram, Nt-pro-BNP (N-terminal-pro-BNP, pg/ml), AVB: atrioventricular block. VES: ventricular extrasystoles. LAHB: left anterior hemiblock, RBB: right bundle block, AF: atrial fibrillation, S-Per: S-persistence, T-neg: negative T, R-progr: R-progression.

|          | [ <sup>68</sup> Ga]Ga-FAPI-04-PET/CT | LGE                                                                               | T1-Mapping                                                                         | [ <sup>68</sup> Ga]Ga-FAPI-04 (MAV/TLFAP cm <sup>3</sup> )                         | LGE (%)                                  | T1 relax. Time (msec) | Nt-pro-BNP (pg/ml) | EF (%) | ECG abnormalities |                       |
|----------|--------------------------------------|-----------------------------------------------------------------------------------|------------------------------------------------------------------------------------|------------------------------------------------------------------------------------|------------------------------------------|-----------------------|--------------------|--------|-------------------|-----------------------|
| <b>A</b> | BL                                   | 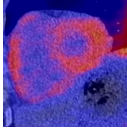 |   |   | SUV mean 2.1<br>MAV 286.0<br>TLFAP 600.6 | 18.4                  | 1032               | 111    | 40                | RBB                   |
|          | FU                                   |                                                                                   |   |   |                                          | 20.7                  | 1054               | 277    | 20                | RBB, accumulating VES |
| <b>B</b> | BL                                   |  |   |   | SUV mean 2.3<br>MAV 21.0<br>TLFAP 54.7   | 15.8                  | 1108               | 1170   | 50                | No abnormalities      |
|          | FU                                   |                                                                                   |  |  |                                          | 16.0                  | 1041               | 301    | 57                | No abnormalities      |

**Supplementary Figure 6: Follow up observations of participants 11 and 14.** Representative images of [<sup>68</sup>Ga]-FAPI-04-PET/CT scan and the corresponding cMRI (LGE and T1) at baseline (BL) and the corresponding sections of the same modalities on follow up (FU) are shown. Clinical findings including serum Nt-pro-BNP levels, EF(%) and ECG findings are tabulated. **A:** Clinical progress on follow up despite therapy with nintedanib and MMF (Participant 11). **B:** Myocardial fibrosis on MRI and low <sup>68</sup>Ga-FAPI-04 uptake at BL and stable MRI and improved clinical parameters on FU (Participant 14). BL: baseline, FU: follow up, VES: ventricular extrasystoles, RBB: right bundle branch block, EF: ejection fraction.
